# Supplementary material for: Characterization of ginsenoside extracts by delayed luminescence, high-performance liquid chromatography, and bioactivity tests
Source: Royal Society of Chemistry journal article supplement (doi:10.1039/c8pp00533h), 2019-02-06
Supplement: c8pp00533h1.xlsx [file c8pp00533h1.xlsx]

## Sheet: Sheet1
% ginsenoside in extract
	Rd	Re	Rg1	Total percentage
Batch 1	16.5889	20.7308	7.07349	44.3932
Batch 2	8.61564	18.0913	6.98292	33.6898
Batch 3	9.72908	18.9083	7.03862	35.676
Batch 4	11.9713	17.1968	6.05526	35.2234
Batch 5	11.1868	23.9682	8.18812	43.3431
Batch 6	12.637	16.3183	5.68408	34.6394
Batch 7	11.2926	16.3927	6.08916	33.7744
Batch 8	7.81022	18.641	7.54	33.9912
Batch 9	17.4981	18.5037	6.09361	42.0953
Batch 10	9.33949	18.6738	6.664	34.6773
Batch 11	13.643	20.1685	6.58335	40.3948
Based on the 2015 Chinese Pharmacopoeia, the total amount of ginsenoside Rg1, Rd and Re should be not less than 30 percent and not more than 45 percent in the ginsenoside extracts derived from ginseng stems and leaves
