# Supplementary material for: Characterization of ginsenoside extracts by delayed luminescence, high-performance liquid chromatography, and bioactivity tests
Source: Royal Society of Chemistry journal article supplement (doi:10.1039/c8pp00533h), 2019-02-06
Supplement: c8pp00533h2.xlsx [file c8pp00533h2.xlsx]

## Sheet: Table S2
DL	Ginsenoside	Correlation coefficient	p value
Beta	Rg1	0.9	0
Tau	Rg1	0.845	0.001
I0	Rb2	-0.836	0.001
I0	Rd	-0.773	0.005
T	Rg1	0.764	0.006
I0	Rc	-0.718	0.013
I0	F1	-0.691	0.019
T	Rd	-0.682	0.021
Tau	Rd	-0.636	0.035
Beta	Rd	-0.618	0.043
Beta	Re	0.609	0.047
T	Rb2	-0.6	0.051
Tau	Rb2	-0.582	0.06
Tau	Re	0.555	0.077
Beta	Rb1	-0.545	0.083
I0	Rh1	-0.527	0.096
T	F1	-0.509	0.11
Beta	Rb2	-0.491	0.125
T	Rc	-0.455	0.16
T	Re	0.455	0.16
Tau	Rb1	-0.418	0.201
Tau	Rc	-0.418	0.201
Tau	F1	-0.409	0.212
I0	Rg1	0.4	0.223
Beta	Rg2	-0.355	0.285
Beta	Rc	-0.345	0.298
T	Rb1	-0.318	0.34
Beta	F1	-0.264	0.433
Tau	Rg2	-0.209	0.537
T	Rh1	-0.145	0.67
T	Rg2	-0.109	0.75
I0	Re	0.091	0.79
Tau	Rh1	-0.055	0.873
I0	Rb1	-0.045	0.894
I0	Rg2	0.036	0.915
Beta	Rh1	0	1
